# Supplementary material for: Substrate sequence selectivity of APOBEC3A implicates intra-DNA interactions
Source: PubMed Central journal article supplement (PMC5951847; doi:10.1038/s41598-018-25881-z), 2018-05-14
Supplement: 41598_2018_25881_MOESM1_ESM.pdf [file 41598_2018_25881_MOESM1_ESM.pdf]

# Supplementary Information

## Substrate sequence selectivity of APOBEC3A implicates intra-DNA interactions

Tania V. Silvas<sup>1</sup>, Shurong Hou<sup>1</sup>, Wazo Myint<sup>2</sup>, Ellen Nalivaika<sup>1</sup>, Mohan Somasundaran<sup>1</sup>, Brian A. Kelch<sup>1</sup>, Hiroshi Matsuo<sup>2</sup>, Nese Kurt Yilmaz<sup>1</sup>, and Celia A. Schiffer<sup>1,\*</sup>

<sup>1</sup>Biochemistry and Molecular Pharmacology, UMass Medical School, Worcester, MA, 01655, USA

<sup>2</sup>Leidos Biomedical Research, Inc., Frederick National Laboratory for Cancer Research, Frederick, MD, 21701, USA

\* To whom correspondence should be addressed.

Email: [Celia.Schiffer@umassmed.edu](mailto:Celia.Schiffer@umassmed.edu)

Celia Schiffer, Ph.D.  
Department of Biochemistry and Molecular Pharmacology  
University of Massachusetts Medical School  
364 Plantation Street  
Worcester MA, 01605-2324  
Phone: (508) 856-8008  
Fax: (508) 856-6215

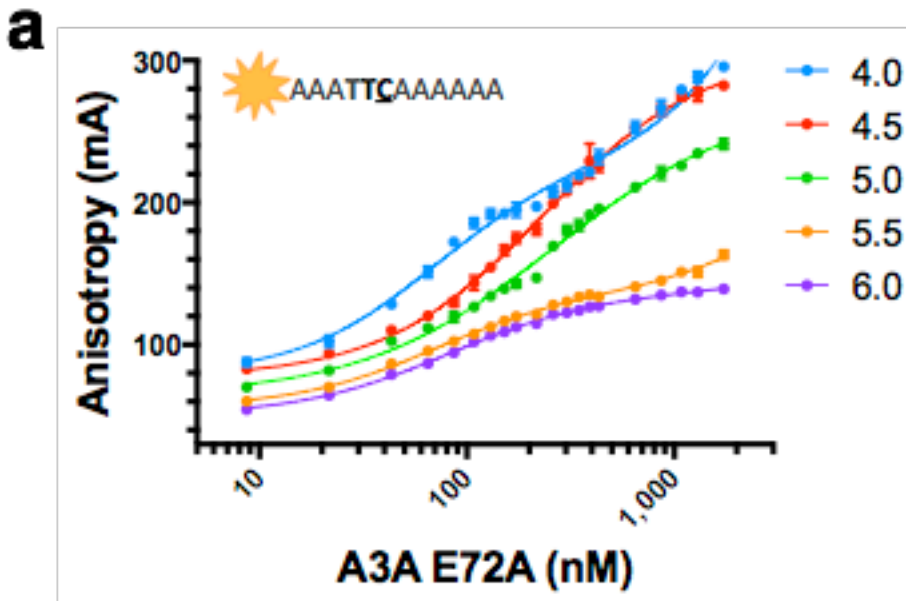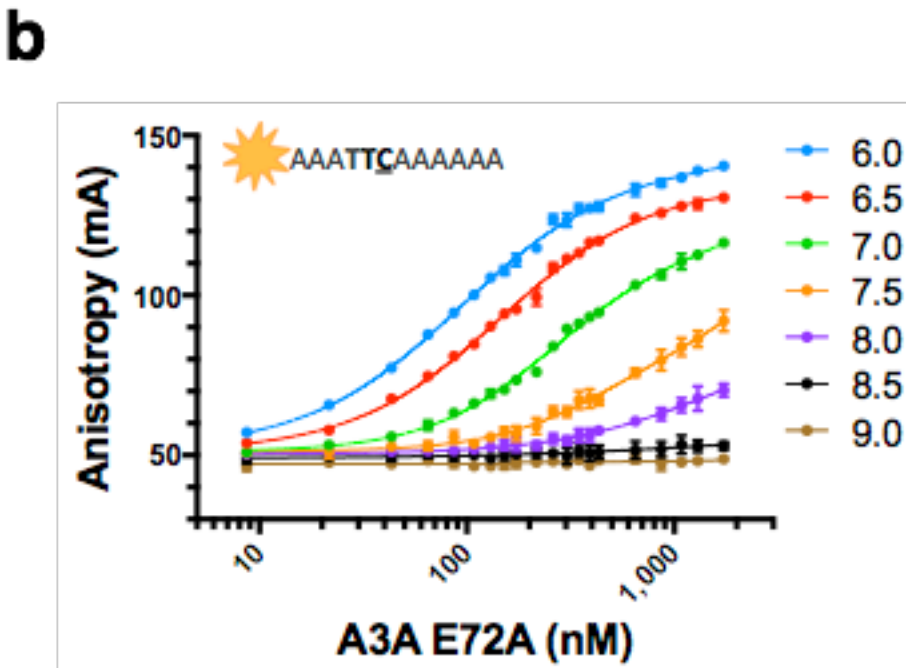

**Supplementary Figure 1. A3A affinity to ssDNA at different pHs.** Fluorescence anisotropy of TAMRA-labeled ssDNA 4A-TTC-6A binding to A3A(E72A). **a)** Binding of A3A to ssDNA at pH 4.0 (blue), 4.5 (red), 5.0 (green), 5.5 (orange), and 6.0 (purple). **b)** Binding of A3A to ssDNA at pH 6.0 (blue), 6.5 (red), 7.0 (green), 7.5 (orange), 8.0 (purple), 8.5 (black), 9.0 (brown).

**Supplementary Table 1.** A3A affinity ( $K_d$  in nM) for ssDNA Poly A -TTC in a range of pHs.

| <b>pH</b>  | <b>KD</b>             |
|------------|-----------------------|
| <b>4.0</b> | Could not calculate   |
| <b>4.5</b> | Could not calculate   |
| <b>5.0</b> | Could not calculate   |
| <b>5.5</b> | 68 ± 3                |
| <b>6.0</b> | 90 ± 1                |
| <b>6.5</b> | 146 ± 8               |
| <b>7.0</b> | 260 ± 21              |
| <b>7.5</b> | > 4,500               |
| <b>8.0</b> | > 5,000               |
| <b>8.5</b> | no detectable binding |
| <b>9.0</b> | no detectable binding |

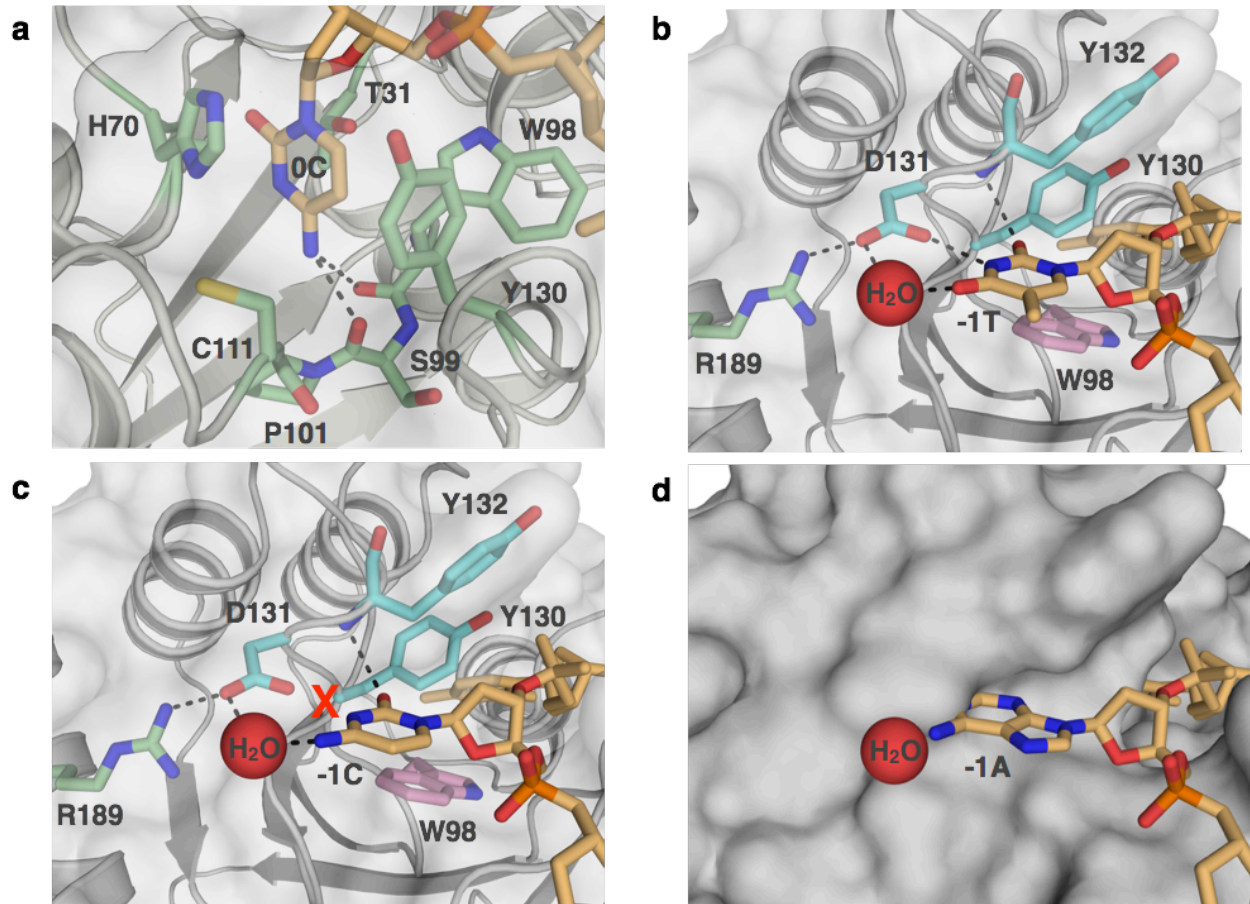

**Supplementary Figure 2. A3A recognition of substrate cytidine and pyrimidines at -1.** Crystal structure of A3A(E72A/C171A) shown in surface view (gray) bound to Poly T-1C ssDNA sequence represented as sticks (PDB ID: 5KEG). **a)** substrate cytidine (orange sticks) is buried in active site of A3A. Residues interacting with cytidine are shown in green sticks. **b)** -1 nucleotide thymidine (orange sticks) surrounded by Y130, D131 and Y132 of loop 7 (light blue sticks), W98 of loop 5 (pink sticks), and R189 (green sticks). **c)** Cytidine modeled into -1 position (orange sticks). N3 atom lacks proton to hydrogen bond with D131 indicate with a red X. **d)** Adenosine modeled into -1 position (orange sticks) shows severe van der Waal clashes if occupying the same site as the pyrimidines. Other nucleotides are shown as orange sticks. Hydrogen bond and a salt bridges shown in dashes black lines. Water shown as red spheres. Nitrogen and oxygen of residues and nucleic acids are in blue and red respectively.

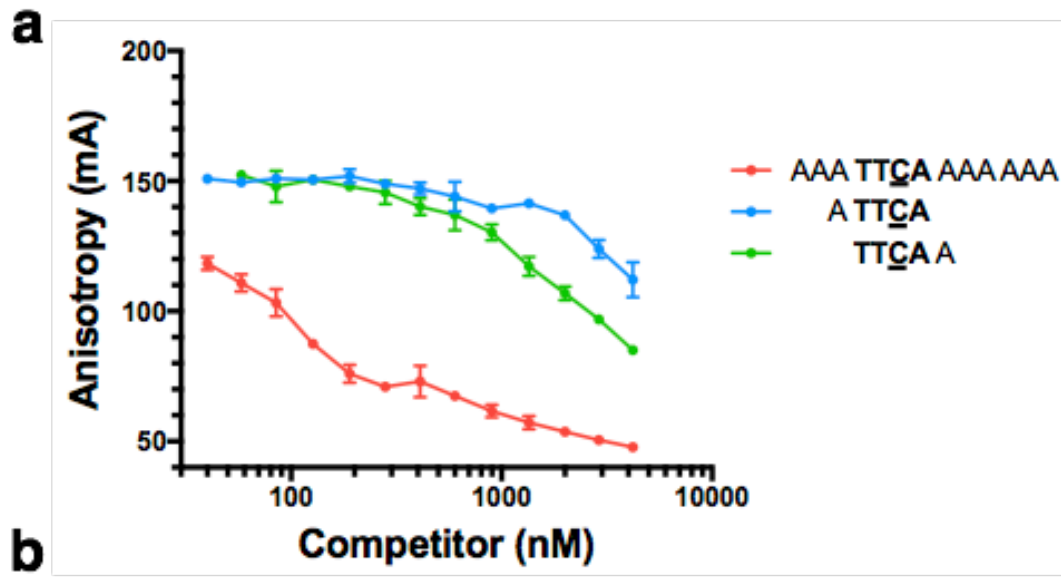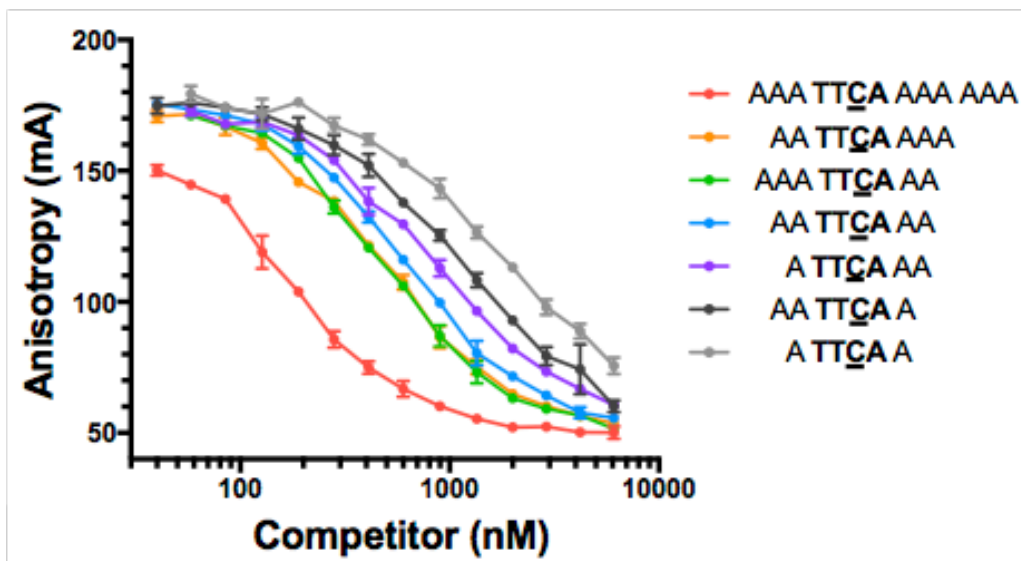

**Supplementary Figure 3. A3A affinity to ssDNA of varied lengths.** Fluorescence anisotropy of TAMRA-labeled ssDNA 3A-TTCA-6A to A3A(E72A) competing with unlabeled ssDNA of different lengths. **a)** Binding of A3A to labeled ssDNA preincubated with unlabeled 3A-TTCA-6A (red), 1A-TTCA (blue), and TTCA-1A (green). **b)** Binding of A3A to labeled ssDNA preincubated with unlabeled 3A-TTCA-6A (red), 2A-TTCA-3A (blue), 3A-TTCA-2A (green), 2A-TTCA-2A (blue), 1A-TTCA-2A (purple), 2A-TTCA-1A (black), and 1A-TTCA-1A (gray).

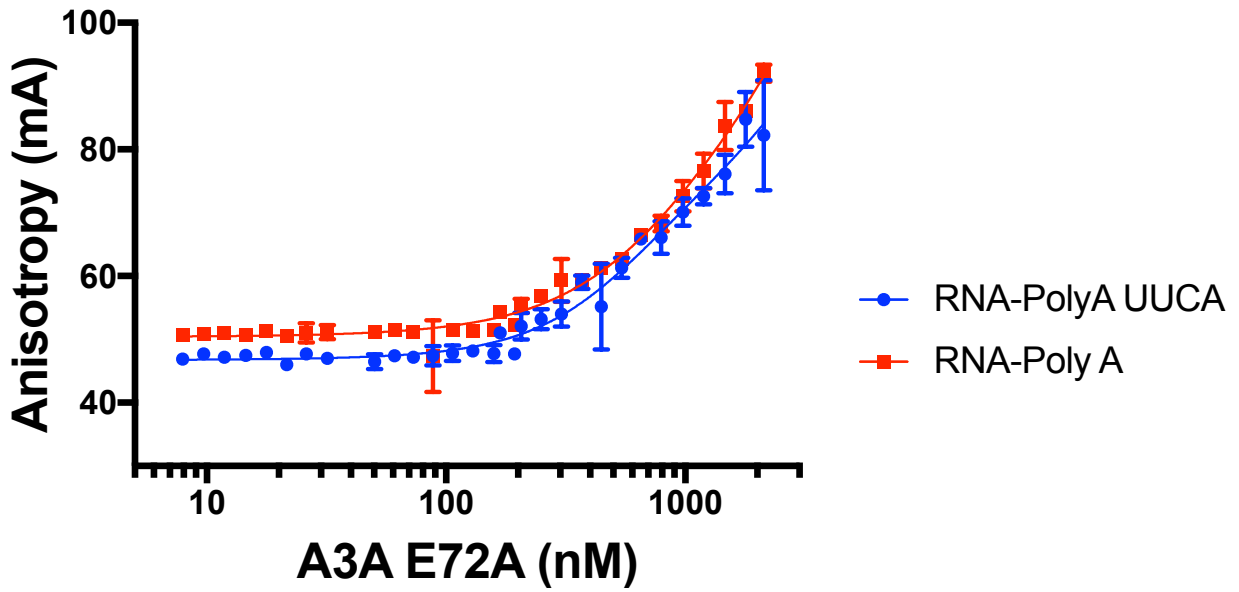

**Supplementary Figure 4. A3A affinity to ssRNA**

Fluorescence anisotropy of TAMRA-labeled ssRNA sequences to A3A(E72A). Binding of A3A to ssRNA with PolyA UUCA (blue) and ssRNA Poly A (red).
